# Supplementary material for: Baicalin promotes hippocampal neurogenesis via SGK1- and FKBP5-mediated glucocorticoid receptor phosphorylation in a neuroendocrine mouse model of anxiety/depression
Source: PubMed Central journal article supplement (PMC4977505; doi:10.1038/srep30951), 2016-08-09
Supplement: srep30951-s1.pdf [file srep30951-s1.pdf]

**Baicalin promotes hippocampal neurogenesis via SGK1- and FKBP5-mediated glucocorticoid receptor phosphorylation in a neuroendocrine mouse model of anxiety/depression**

Kuo Zhang<sup>a</sup>, Xing Pan<sup>a</sup>, Fang Wang<sup>a</sup>, Jie Ma<sup>a</sup>, Guangyue Su<sup>b</sup>, Yingxu Dong<sup>a</sup>, Jingyu Yang<sup>a,\*</sup>,  
Chunfu Wu<sup>a,\*\*</sup>

<sup>a</sup> *Department of Pharmacology, Shenyang Pharmaceutical University, 110016, Shenyang, PR China*

<sup>b</sup> *Department of School of Functional Food And Wine, Shenyang Pharmaceutical University, 110016, Shenyang, PR China*

\* Corresponding author at: Department of Pharmacology, Shenyang Pharmaceutical University, Box 31, 103 Wenhua Road, 110016, Shenyang, PR China. Tel. & Fax: +86 24 23986339. E-mail address: yangjingyu2006@gmail.com

\*\* Corresponding author at: Department of Pharmacology, Shenyang Pharmaceutical University, Box 31, 103 Wenhua Road, 110016, Shenyang, PR China. Tel. & Fax: +86 24 23986339. E-mail address: wucf@syphu.edu.cn

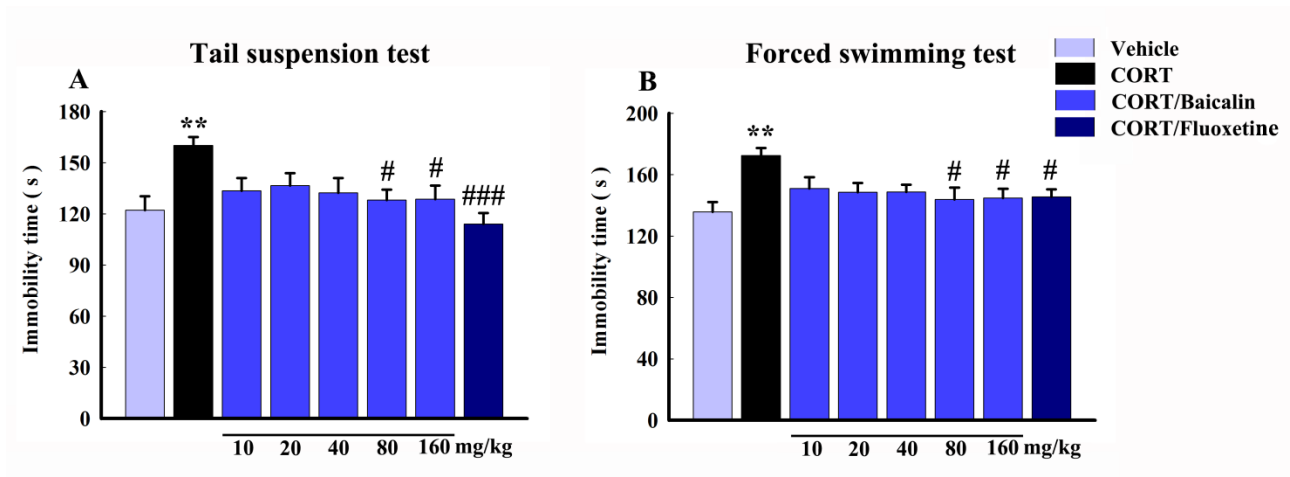

**Supplementary Fig. S1** Effects of baicalin (40, 80 and 160 mg/kg) in the CORT model of anxiety/depression on immobility time in the tail suspension test (A) and the forced swimming test (B). Data are expressed as means  $\pm$  S.E.M ( $n = 12-15$  mice/group). \*\* $P < 0.01$  vs vehicle. # $P < 0.05$  and ### $P < 0.001$  vs CORT model.

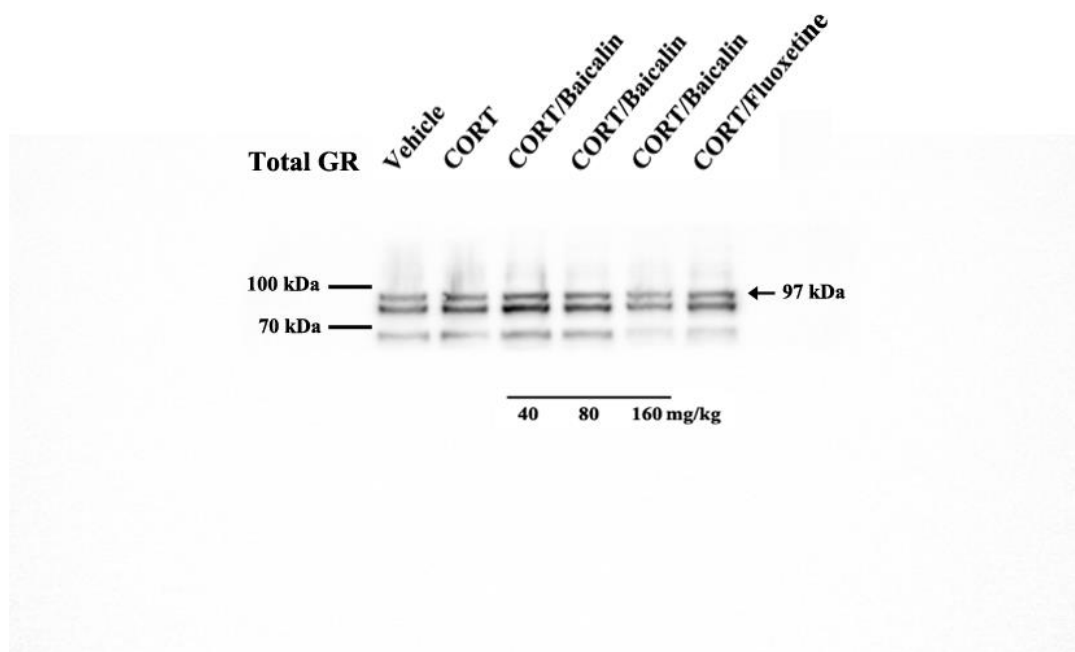

**Supplementary Fig. S2** Representative blots of total GR in hippocampus in the CORT model of anxiety/depression

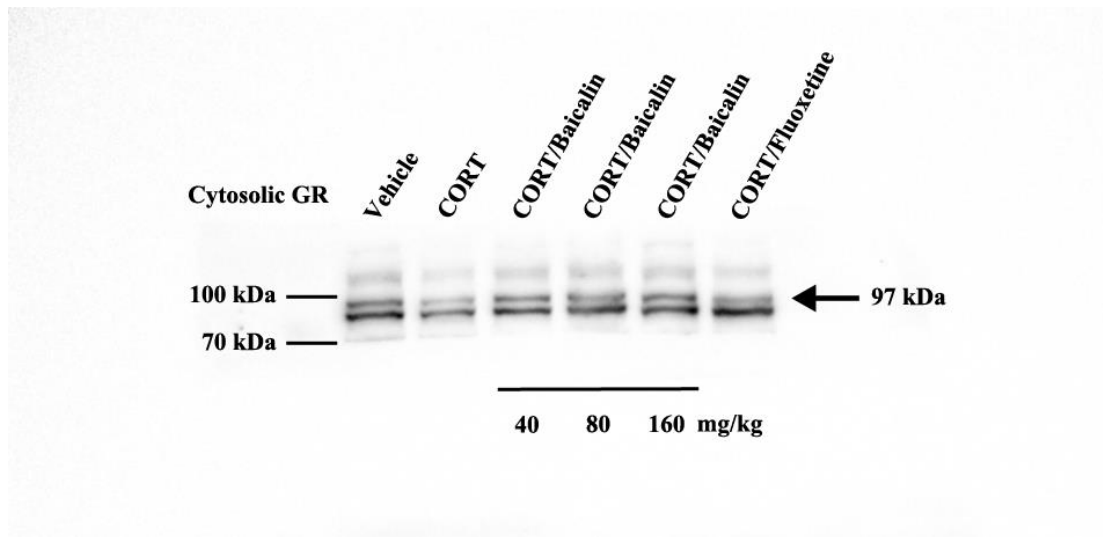

**Supplementary Fig. S3** Representative blots of cytosolic GR in hippocampus in the CORT model of anxiety/depression

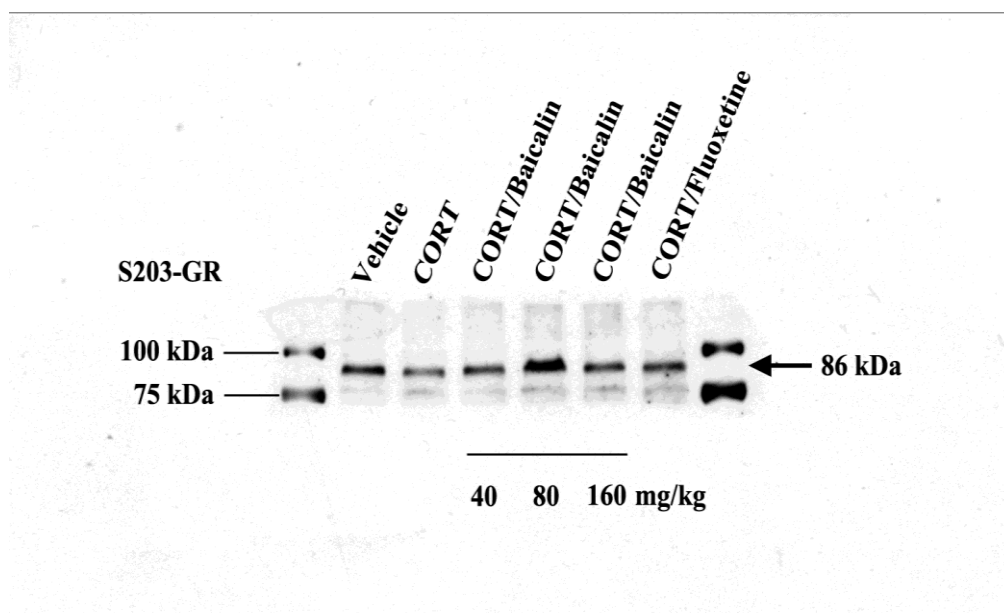

**Supplementary Fig. S4** Representative blots of S203-GR in hippocampus in the CORT model of anxiety/depression

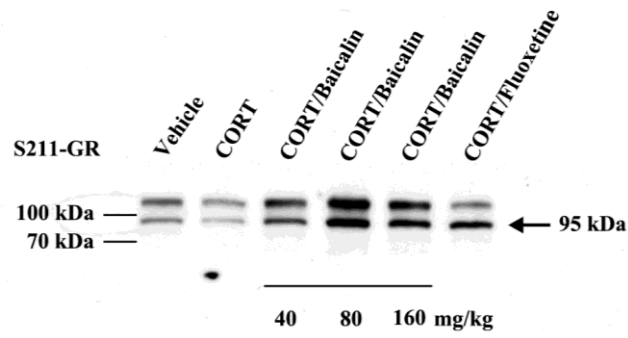

**Supplementary Fig. S5** Representative blots of S211-GR in hippocampus in the CORT model of anxiety/depression

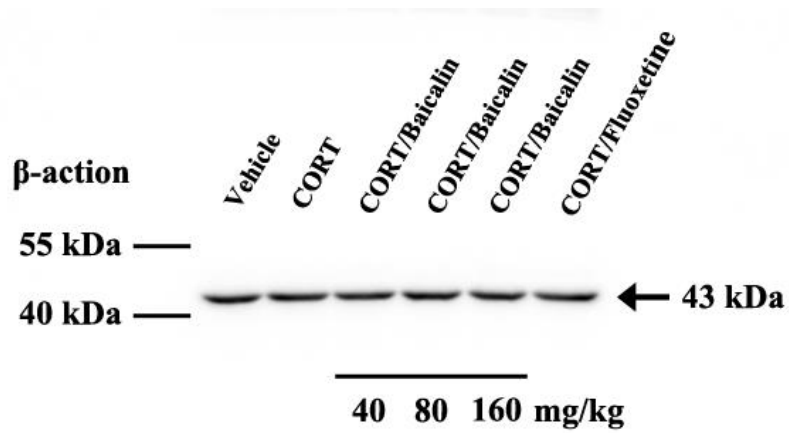

**Supplementary Fig. S6** Representative blots of  $\beta$ -action in hippocampus in the CORT model of anxiety/depression

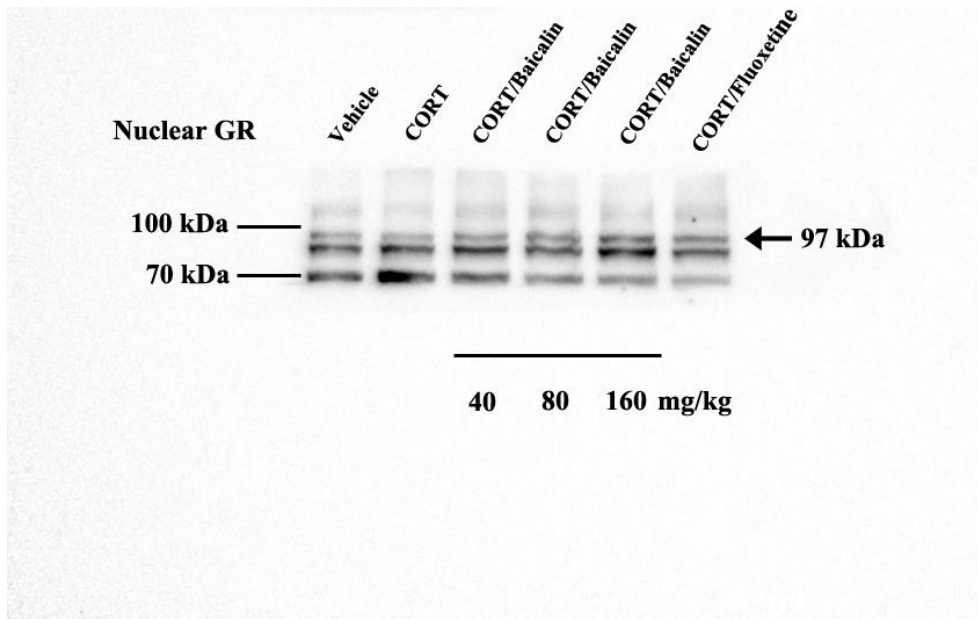

**Supplementary Fig. S7** Representative blots of Nuclear GR in hippocampus in the CORT model of anxiety/depression

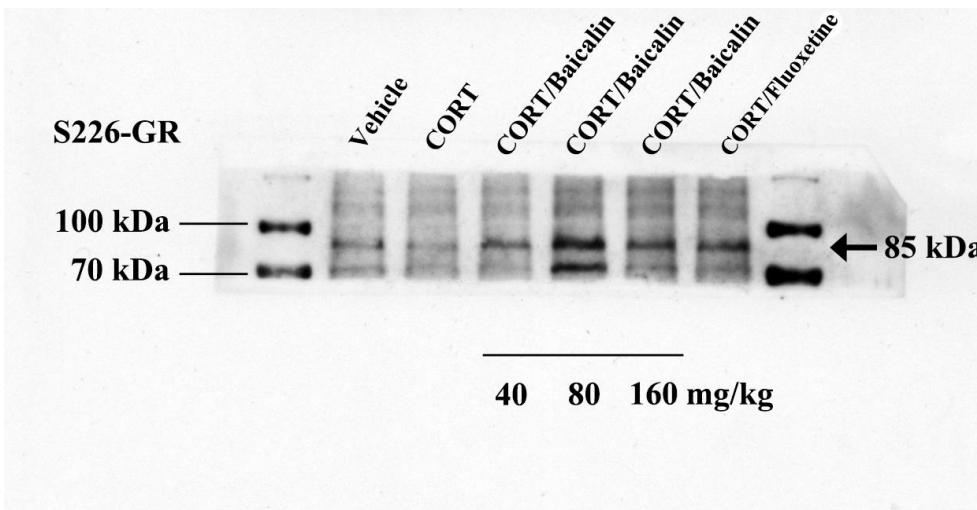

**Supplementary Fig. S8** Representative blots of S226-GR in hippocampus in the CORT model of anxiety/depression

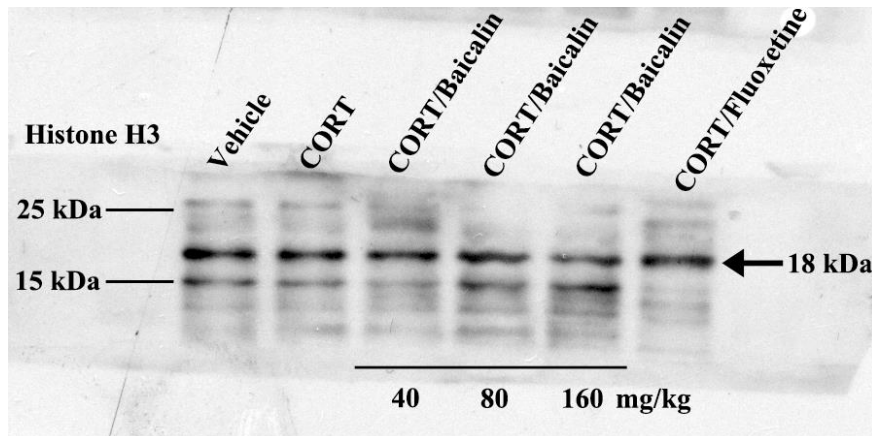

**Supplementary Fig. S9** Representative blots of Histone H3 in hippocampus in the CORT model of anxiety/depression

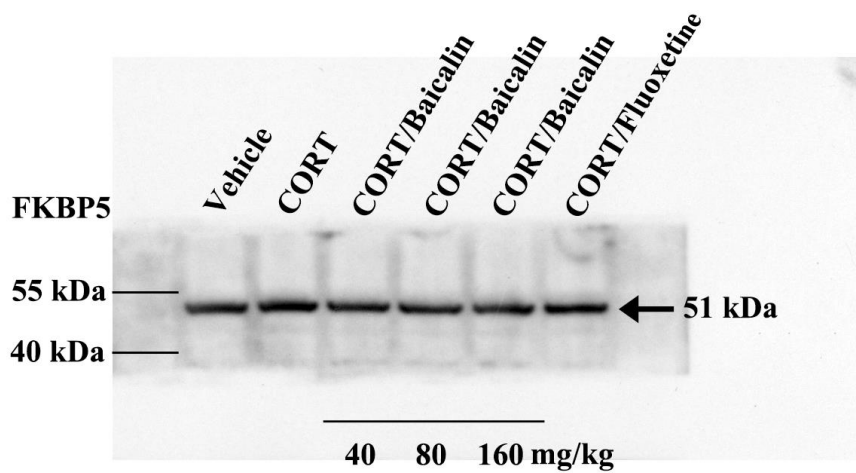

**Supplementary Fig. S10** Representative blots of FKBP5 in hippocampus in the CORT model of anxiety/depression

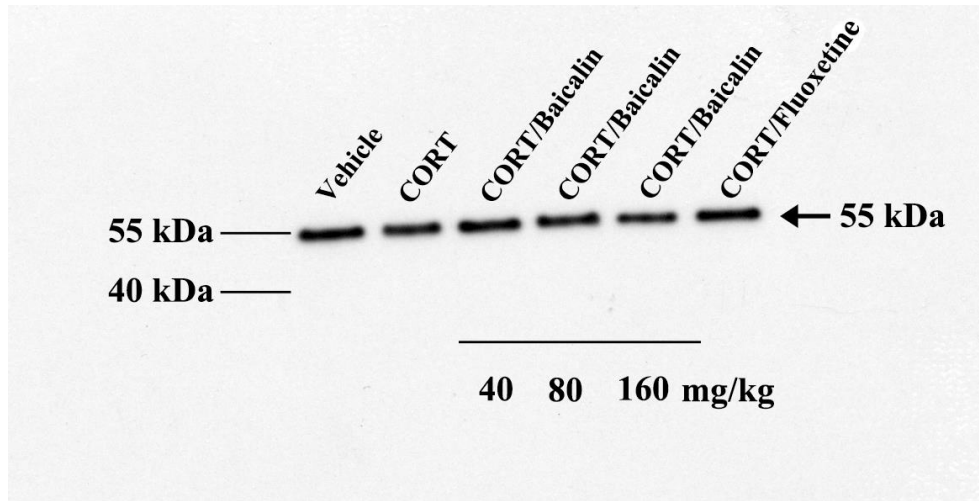

**Supplementary Fig. S11** Representative blots of SGK1 in hippocampus in the CORT model of anxiety/depression

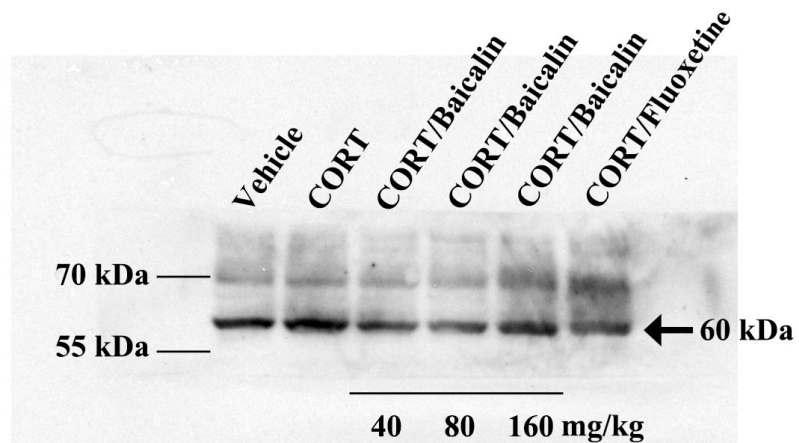

**Supplementary Fig. S12** Representative blots of S422-SGK1 in hippocampus in the CORT model of anxiety/depression

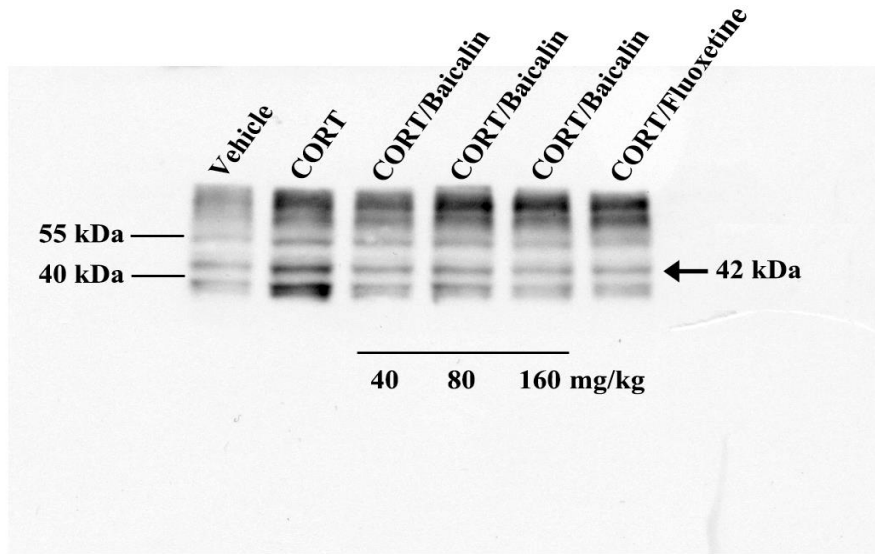

**Supplementary Fig. S13** Representative blots of T256-SGK1 in hippocampus in the CORT model of anxiety/depression
